# Supplementary material for: Radiotherapy may improve survival of ES-SCLC with distant metastasis only for patients with one metastatic site: A population-based study
Source: PubMed Central journal article supplement — Oncol Lett. 2019 Nov 14;19(1):139–46. doi: 10.3892/ol.2019.11092 (PMC6923894; doi:10.3892/ol.2019.11092), 2019-11-14

Figure S1. CSS curves for patients with ES-SCLC between RT and non-RT groups based on three metastasis sites. The CSS curve for patients with (A) bone + brain + liver metastasis: ( $P=0.095$ ), (B) bone + brain + lung metastasis ( $P=0.001$ ), (C) bone + liver + lung metastasis ( $P=0.042$ ) and (D) patients with brain + liver + lung metastasis ( $P=0.217$ ). CSS, cancer-specific survival; ES-SCLC, extensive stage small cell lung cancer; RT, radiotherapy.

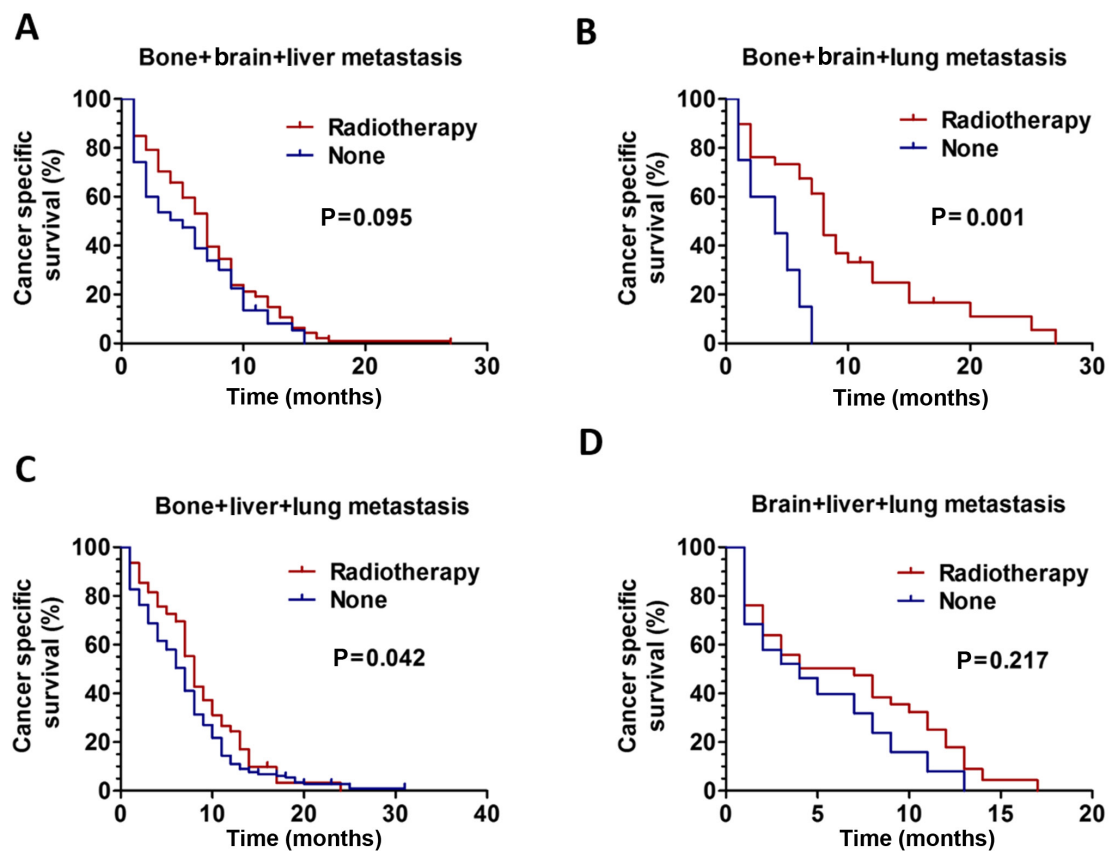

Supplement: Supplementary_Data.pdf [file Supplementary_Data.pdf]
